# Supplementary material for: Characterization of Salmonella spp. and E. coli Strains Isolated from Wild Carnivores in Janos Biosphere Reserve, Mexico
Source: MDPI journal article supplement (doi:10.3390/ani12091064), 2022-04-20
Supplement: s1 [file s1]

## Supplementary tables and figures

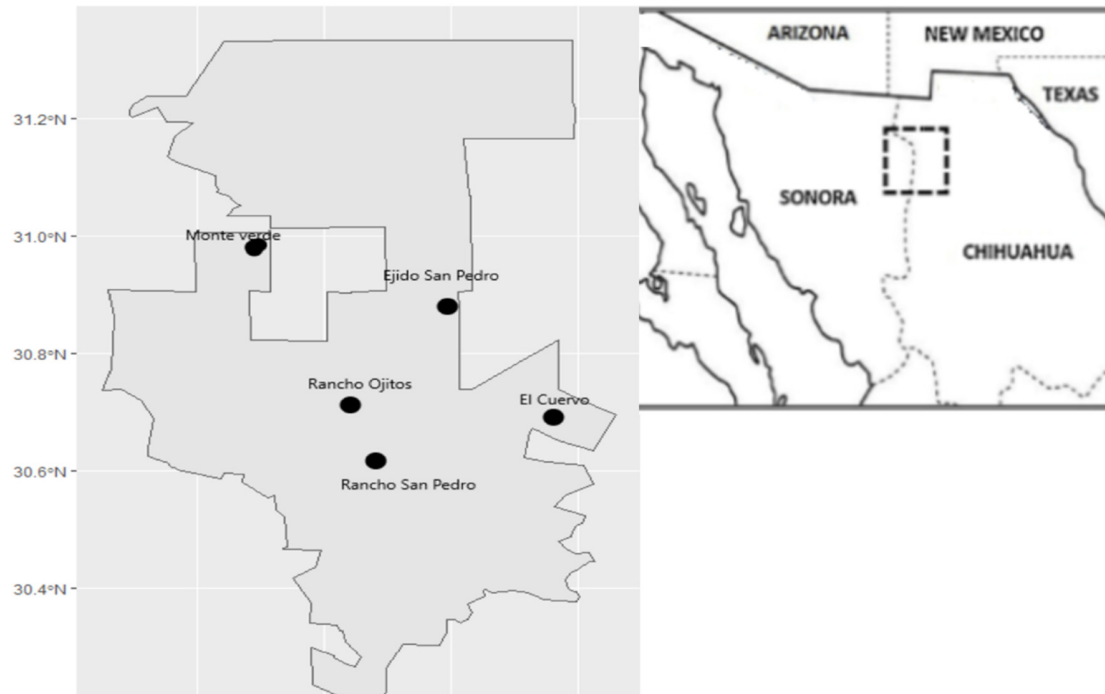

**Supplementary Figure S1.** Localization of the study area and sampling sites: a sampling point localization. Box with discontinuous borders represent study area (Janos Biosphere Reserve), black circles represent the five sampling locations.

**Supplementary Table S1. Primer sequences and conditions for *Salmonella* and *E. coli* genetic characterization by PCR.**

| Name        | Sequence (forward/reverse)                                       | Cycle conditions                                                                               | Amplicon | Ref.       | Function                                          |
|-------------|------------------------------------------------------------------|------------------------------------------------------------------------------------------------|----------|------------|---------------------------------------------------|
| 16ITS       | 5'-TGCGGCTGGATCACCTCCTT-3' / 5'-TATAGCCCCATCGTGTAGTCAGAAC-3'     | 1 cycle 94 °C 5 min; 35 cycles 94 °C 1 min, 57 °C 1 min and 72 °C 2 min; 1 cycle 72 °C 5 min   | 312      | [1]        | component of the prokaryotic ribosome 30S subunit |
| <i>invA</i> | 5'-GTGAAATTATCGCCACGTTTCGGGCAA-3' / 5'-TCATCGCACCGTCAAAGGAACC-3' | 1 cycle 94 °C 5 min; 35 cycles 94 °C 1 min, 57 °C 1 min and 72 °C 2 min; 1 cycle 72 °C 5 min   | 280      | This study | component of the System secretion type III        |
| <i>sopE</i> | 5'-GTGACAAAAATAACTTTATCT-3' / 5'-GGGAGTGTATTGTATATATTT-3'        | 1 cycle 94 °C 5 min; 35 cycles 94 °C 1 min, 43.5 °C 1 min and 72 °C 2 min; 1 cycle 72 °C 5 min | 700      | This study | Toxin associated with invasion                    |
| <i>cdtB</i> | 5'-ATTTCTTTTGCCTGCGC-3' / 5'-GATCAGAAGCGAGTTGTGG-3'              | 1 cycle 94 °C 5 min; 35 cycles 94 °C 1 min, 44 °C 1 min and 72 °C 2 min; 1 cycle 72 °C 5 min   | 700      | This study | Subunit of the cytolethal distending toxin        |
| <i>stdA</i> | 5'-ATGCGTAATAAAATAAATACTTGCC-3' / 5'-ATTCAGGGTGTAGGTGACG-3'      | 1 cycle 94 °C 5 min; 35 cycles 94 °C 1 min, 50 °C 1 min and 72 °C 2 min; 1 cycle 72 °C 5 min   | 550      | This study | Fimbrial protein                                  |
| <i>lpfA</i> | 5'-ATGGAGTTTTTAATGAAAAAGGTT-3' / 5'-GGACAGGTTGAAGTCCACTT-3'      | 1 cycle 94 °C 5 min; 35 cycles 94 °C 1 min, 50 °C 1 min and 72 °C 2 min; 1 cycle 72 °C 5 min   | 310      | This study | Fimbrial protein                                  |
| <i>stfA</i> | 5'-ATGAATACAGCAGTAAAAGCTG-3' / 5'-ATCGTGAAGTTTACGGTGC-3'         | 1 cycle 94 °C 5 min; 35 cycles 94 °C 1 min, 50 °C 1 min and 72 °C 2 min; 1 cycle 72 °C 5 min   | 330      | This study | Fimbrial protein                                  |
| <i>bcfA</i> | 5'-ATGAAAAAGCCTGTACTAGCATTAAT-                                   | 1 cycle 94 °C 5 min; 35 cycles 94 °C 1 min, 55 °C 1 min and                                    | 539      | This study | Fimbrial protein                                  |

|             |                                                                                   |                                                                                                    |     |            |                                            |
|-------------|-----------------------------------------------------------------------------------|----------------------------------------------------------------------------------------------------|-----|------------|--------------------------------------------|
|             | 3'/5'-<br>GGAATAAACCATGCTAAATGTCG-3'                                              | 72 °C 2 min; 1 cycle 72 °C 5 min                                                                   |     |            |                                            |
| <i>stiA</i> | 5'-<br>ATGAAACTCTCCTTAAAAACACTCAC-<br>3'/5'-<br>CAGTTATATTGCAGATAGAATGTTGC-<br>3' | 1 cycle 94 °C 5 min; 35 cycles<br>94 °C 1 min, 55 °C 1 min and<br>72 °C 2 min; 1 cycle 72 °C 5 min | 539 | This study | Fimbrial protein                           |
| <i>stbA</i> | 5'-ATGGCTGTTTCTGATAACACC-3'/5'-<br>CAGCGACTGTCCCAGC-3'                            | 1 cycle 94 °C 5 min; 35 cycles<br>94 °C 1 min, 55 °C 1 min and<br>72 °C 2 min; 1 cycle 72 °C 5 min | 444 | This study | Fimbrial protein                           |
| <i>steA</i> | 5'-ATGGGAATTGTCTCCGG-3'/5'-<br>ACAGGTAAGAGATAGTGACGTTG-3'                         | 1 cycle 94 °C 5 min; 35 cycles<br>94 °C 1 min, 55 °C 1 min and<br>72 °C 2 min; 1 cycle 72 °C 5 min | 537 | This study | Fimbrial protein                           |
| <i>fimA</i> | 5'-ATGACCTCTACTATTGCGAGTCT-3'/<br>5'-ATGATAAAGGTGGCGTCG-3'                        | 1 cycle 94 °C 5 min; 35 cycles<br>94 °C 1 min, 55 °C 1 min and<br>72 °C 2 min; 1 cycle 72 °C 5 min | 529 | This study | Fimbrial protein                           |
| <i>sefA</i> | 5'-ATGCGTAAATCAGCATCTGC-3'/5'-<br>ATACTGCTGAACGTAGAAGGTCG-3'                      | 1 cycle 94 °C 5 min; 35 cycles<br>94 °C 1 min, 55 °C 1 min and<br>72 °C 2 min; 1 cycle 72 °C 5 min | 488 | This study | Fimbrial protein                           |
| <i>eae</i>  | 3'-CGGGGACATTTTAGTCA-5'/<br>5'-GATCAGAAGCGAGTTGTGG-3'                             | 1 cycle 94 °C 5 min; 35 cycles<br>94 °C 1 min, 56 °C 1 min and<br>72 °C 2 min; 1 cycle 72 °C 5 min | 600 | This study | Intimin of E. coli                         |
| <i>escV</i> | 3'-GGCTCTCTTCTTCTTTATGGCTG-5'/<br>5'-CCTTTTACAACTTCATCGCC-3'                      | 1 cycle 94 °C 5 min; 35 cycles<br>94 °C 1 min, 56 °C 1 min and<br>72 °C 2 min; 1 cycle 72 °C 5 min | 534 | [2]        | component of the System Secretion type III |
| <i>bfpB</i> | 3'-GATAAAACTGATACTGGGCAGC-5'/<br>5'-AGTGACTGTTCCGGGAAGCAC-3'                      | 1 cycle 94 °C 5 min; 35 cycles<br>94 °C 1 min, 57 °C 1 min and<br>72 °C 2 min; 1 cycle 72 °C 5 min | 826 | [2]        | Fimbrial protein                           |

|             |                                                                                   |                                                                                                       |     |            |                           |
|-------------|-----------------------------------------------------------------------------------|-------------------------------------------------------------------------------------------------------|-----|------------|---------------------------|
| <i>stx1</i> | 3'-GGCGTTCTTATGTAATGACTGC-5'/<br>5'-ATCCACGGAAGTCTTCCATC-3'                       | 1 cycle 94 °C 5 min; 35 cycles<br>94 °C 1 min, 57 °C 1 min and<br>72 °C 2 min; 1 cycle 72 °C 5<br>min | 250 | [2]        | Subunit of Shiga<br>toxin |
| <i>stx2</i> | 3'-CGTTTTGACCATCTTCGTCTG-5'/<br>5'-AGCGTAAGGCTTCTGCTGTG-3'                        | 1 cycle 94 °C 5 min; 35 cycles<br>94 °C 1 min, 57 °C 1 min and<br>72 °C 2 min; 1 cycle 72 °C 5<br>min | 325 | [2]        | Subunit of Shiga<br>toxin |
| <i>st</i>   | 3'-<br>TAGAGACCGGTATTACAGAAATCTGA-<br>5'/<br>5'-<br>TCATCCCGAATTCTGTTATATATGTC-3' | 1 cycle 94 °C 5 min; 35 cycles<br>94 °C 1 min, 60 °C 1 min and<br>72 °C 2 min; 1 cycle 72 °C 5<br>min | 282 | This study | Thermostable<br>toxin     |
| <i>lt</i>   | 3'-GGGTTGGCAATTTTATTTCTGTA-5'/<br>5'-ATTACAACAAAGTTCACAGCAGTA-<br>3'              | 1 cycle 94 °C 5 min; 35 cycles<br>94 °C 1 min, 60 °C 1 min and<br>72 °C 2 min; 1 cycle 72 °C 5<br>min | 183 | This study | Thermolabile<br>toxin     |

1. Chiu, T.H.; Chen, T.R.; Hwang, W.Z.; Tsen, H.Y. Sequencing of an internal transcribed spacer region of 16S-23S rRNA gene and designing of PCR primers for the detection of *Salmonella* spp. in food. *Int. J. Food Microbiol.* **2005**, *97*, 259–265.
2. Müller, D.; Hagedorn, P.; Brast, S.; Heusipp, G.; Bielaszewska, M.; Friedrich, A.W.; Karch, H.; Schmidt, M.A. Rapid identification and differentiation of clinical isolates of enteropathogenic *Escherichia coli* (EPEC), atypical EPEC, and Shiga toxin-producing *Escherichia coli* by a one-step multiplex PCR method. *J. Clin. Microbiol.* **2006**, *44*, 2626–2629.

**Supplementary Table S2. Characteristics of *E. coli* strains isolated from carnivores.**

| Specie                 | Strain name | Serotype |     | Virulence genes  | Phylogroup |
|------------------------|-------------|----------|-----|------------------|------------|
|                        |             | O        | H   |                  |            |
| <i>Vulpes macrotis</i> | 20-BVul4    | O153     | H21 | <i>escV-eae</i>  | Unknown    |
| <i>Vulpes macrotis</i> | 20-BVul5    | O153     | H21 | <i>eae</i>       | Unknown    |
| <i>Vulpes macrotis</i> | 20-BVul6    | O153     | H21 | <i>escV-eae</i>  | Unknown    |
| <i>Vulpes macrotis</i> | 20-BVul7    | O153     | H21 | <i>escV-eae</i>  | Unknown    |
| <i>Vulpes macrotis</i> | 20-BVul8    | O153     | H21 | <i>escV-eae</i>  | Unknown    |
| <i>Vulpes macrotis</i> | 20-BVul12   | O153     | H21 | <i>escV-eae</i>  | E          |
| <i>Vulpes macrotis</i> | 20-BVul25   | O153     | H21 | <i>escV-eae</i>  | Unknown    |
| <i>Vulpes macrotis</i> | 20-BVul28   | O153     | H21 | <i>Eae</i>       | Unknown    |
| <i>Vulpes macrotis</i> | 20-Bvul30   | O175     | H16 | <i>escV</i>      | Unknown    |
| <i>Vulpes macrotis</i> | 39-BrVul28  | O139     | H21 | <i>escv</i>      | Unknown    |
| <i>Vulpes macrotis</i> | 39-BrVul18  | O139     | H21 | <i>eae</i>       | Unknown    |
| <i>Vulpes macrotis</i> | 39-BrVul20  | O139     | H21 | <i>eae</i>       | Unknown    |
| <i>Vulpes macrotis</i> | 39-BrVul31  | O139     | H21 | <i>escV</i>      | Unknown    |
| <i>Vulpes macrotis</i> | 39-BrVul5   | O153     | H7  | <i>escV</i>      | Unknown    |
| <i>Vulpes macrotis</i> | 39-BrVul7   | O153     | H7  | <i>escV</i>      | Unknown    |
| <i>Vulpes macrotis</i> | 39-BrVul8   | O153     | H7  | <i>escV</i>      | Unknown    |
| <i>Vulpes macrotis</i> | 39-BrVul23  | O153     | H7  | <i>escv</i>      | Unknown    |
| <i>Vulpes macrotis</i> | 39-BVul23   | O153     | H7  | <i>eae</i>       | Unknown    |
| <i>Vulpes macrotis</i> | 39-BVul24   | O153     | H7  | <i>eae</i>       | Unknown    |
| <i>Vulpes macrotis</i> | 39-BrVul25  | O153     | H7  | <i>escV</i>      | Unknown    |
| <i>Vulpes macrotis</i> | 39-BrVul26  | O153     | H7  | <i>escV</i>      | D          |
| <i>Vulpes macrotis</i> | 39-BrVul29  | O153     | H7  | <i>escV</i>      | E          |
| <i>Vulpes macrotis</i> | 39-BrVul27  | O139     | H?  | <i>escV</i>      | Unknown    |
| <i>Canis latrans</i>   | 26-BCoy3    | O75      | H38 | <i>stx1-stx2</i> | Unknown    |
| <i>Canis latrans</i>   | 26-BCoy19   | O75      | H38 | <i>stx1-stx2</i> | Unknown    |
| <i>Canis latrans</i>   | 26-BCoy6    | O17      | H18 | <i>stx1-stx2</i> | Unknown    |
| <i>Canis latrans</i>   | 35-BCoy26   | O21      | H21 | <i>stx2</i>      | Unknown    |
| <i>Canis latrans</i>   | 35-BCoy27   | O21      | H21 | <i>stx2</i>      | Unknown    |
| <i>Canis latrans</i>   | 35-BCoy35   | O21      | H21 | <i>stx2</i>      | Unknown    |
| <i>Canis latrans</i>   | 35-BCoy36   | O21      | H21 | <i>stx2</i>      | Unknown    |
| <i>Canis latrans</i>   | Coy 3-19    | O110     | H28 | <i>stx1-stx2</i> | Unknown    |
| <i>Canis latrans</i>   | Coy 3-31    | O110     | H28 | <i>stx1-stx2</i> | Unknown    |
| <i>Canis latrans</i>   | 35-BCoy5    | O ?      | H11 | <i>stx2</i>      | Unknown    |
| <i>Canis latrans</i>   | 35-BCoy9    | O ?      | H11 | <i>stx2</i>      | Unknown    |
| <i>Canis latrans</i>   | 35-BCoy14   | O ?      | H11 | <i>stx2</i>      | Unknown    |
| <i>Canis latrans</i>   | 35-BCoy16   | O ?      | H11 | <i>stx2</i>      | D          |
| <i>Canis latrans</i>   | 35-BCoy17   | O ?      | H11 | <i>stx2</i>      | Unknown    |

|                          |            |     |     |                 |         |
|--------------------------|------------|-----|-----|-----------------|---------|
| <i>Canis latrans</i>     | 35-BCoy21  | O ? | H11 | <i>stx2</i>     | Unknown |
| <i>Canis latrans</i>     | 35-BCoy23  | O ? | H11 | <i>stx2</i>     | Unknown |
| <i>Canis latrans</i>     | 35-BCoy24  | O ? | H11 | <i>stx2</i>     | D       |
| <i>Canis latrans</i>     | 35-BCoy28  | O ? | H11 | <i>stx2</i>     | Unknown |
| <i>Canis latrans</i>     | 35-BCoy30  | O ? | H11 | <i>stx2</i>     | Unknown |
| <i>Canis latrans</i>     | 35-BCoy31  | O ? | H11 | <i>stx2</i>     | D       |
| <i>Canis latrans</i>     | 35-BCoy32  | O ? | H11 | <i>stx2</i>     | Unknown |
| <i>Canis latrans</i>     | 35-BCoy33  | O ? | H11 | <i>stx2</i>     | Unknown |
| <i>Mephitis macroura</i> | Meph 15-2  | O63 | H6  | <i>escv</i>     | B2      |
| <i>Mephitis macroura</i> | Meph 15-21 | O63 | H6  | <i>escv</i>     | B2      |
| <i>Mephitis macroura</i> | Meph 15-22 | O63 | H6  | <i>escv</i>     | B2      |
| <i>Mephitis macroura</i> | Meph 15-23 | O63 | H6  | <i>escv</i>     | B2      |
| <i>Mephitis macroura</i> | Meph 15-8  | O63 | H6  | <i>escv</i>     | B2      |
| <i>Mephitis macroura</i> | Meph 15-27 | O63 | H6  | <i>escv</i>     | B2      |
| <i>Mephitis macroura</i> | Meph 15-28 | O63 | H6  | <i>escV-eae</i> | B2      |
| <i>Mephitis macroura</i> | Meph 15-5  | O96 | H49 | <i>escv</i>     | B2      |
| <i>Mephitis macroura</i> | Meph 15-6  | O96 | H49 | <i>escv</i>     | B2      |
| <i>Mephitis macroura</i> | Meph 15-24 | O96 | H49 | <i>escv</i>     | B2      |
| <i>Mephitis macroura</i> | Meph 15-12 | O96 | H49 | <i>escv</i>     | D       |
| <i>Mephitis macroura</i> | Meph 18-7  | O93 | H?  | <i>stx1</i>     | A       |
| <i>Mephitis macroura</i> | Meph 18-8  | O93 | H?  | <i>stx1</i>     | A       |
| <i>Mephitis macroura</i> | Meph 18-17 | O93 | H?  | <i>stx1</i>     | A       |
| <i>Mephitis macroura</i> | Meph 15-12 | nd  | nd  | <i>escv</i>     | B2      |
| <i>Mephitis macroura</i> | Meph 15-1  | nd  | nd  | <i>escV</i>     | B2      |
